# Supplementary material
Source: PubMed Central journal article supplement (PMC3522253)
Supplement: supp_M112.421214_jbc.M112.421214-1.pdf [file supp_M112.421214_jbc.M112.421214-1.pdf]

Supplemental Data for

**“Distinct Characteristics of Two 2-Cys Peroxiredoxins of *Vibrio vulnificus* Suggesting Differential Roles in Detoxifying Oxidative Stress”**

Ye-Ji Bang, Man Hwan Oh, and Sang Ho Choi

**Table S1.** Coexistence of robust and sensitive 2-Cys Prxs among bacteria<sup>a</sup>

| Species and strain                                                          | Robust 2-Cys Prx      | Sensitive 2-Cys Prx   |                  |
|-----------------------------------------------------------------------------|-----------------------|-----------------------|------------------|
|                                                                             | NCBI Accession Number | NCBI Accession Number | GGLG / YF Motifs |
| <b><i>Vibrio</i> sp.</b>                                                    |                       |                       |                  |
| <i>V. vulnificus</i> MO6-24/O                                               | ADV88988              | ADV87477              | GGIG / FL        |
| <i>V. parahaemolyticus</i> 16                                               | EED28503              | EED27256              | GGIG / FL        |
| <i>V. harveyi</i> HY01                                                      | EDL70027              | EDL68011              | GGIG / FL        |
| <i>V. alginolyticus</i> 12G01                                               | EAS78123              | EAS76378              | GGIG / FL        |
| <i>V. splendidus</i> ATCC 33789                                             | EGU42638              | EGU42018              | GGIG / FL        |
| <b><i>Enterobacter</i> sp.</b>                                              |                       |                       |                  |
| <i>E. aerogenes</i> KCTC 2190                                               | AEG97668              | AEG97410              | GGIG / YL        |
| <i>E. hormaechei</i> ATCC 49162                                             | EGK62662              | EGK62209              | GGIG / YL        |
| <i>E. cancerogenus</i> ATCC 35316                                           | EFC55463              | EFC55799              | GGIG / YL        |
| <i>E. sp.</i> 638                                                           | ABP59826              | ABP59556              | GGIG / YL        |
| <i>E. cloacae</i> subsp. <i>cloacae</i> ATCC 13047                          | ADF62617              | ADF60721              | GGIG / YL        |
| <b><i>Pseudoalteromonas</i> sp.</b>                                         |                       |                       |                  |
| <i>P. tunicata</i> D2                                                       | EAR28727              | EAR27480              | GGIG / YL        |
| <i>P. atlantica</i> T6c                                                     | ABG39592              | ABG39923              | GGIG / YL        |
| <i>P. sp.</i> SM9913                                                        | ADT70364              | ADT69123              | GGIG / FL        |
| <i>P. sp.</i> BSi20652                                                      | GAA59355              | GAA58474              | GGIG / FL        |
| <i>P. haloplanktis</i> TAC125                                               | CAI89306              | CAI85920              | GGIG / FL        |
| <b><i>Pseudomonas</i> sp.</b>                                               |                       |                       |                  |
| <i>P. aeruginosa</i> PAO1                                                   | AAG03529              | AAG06917<br>AAG04237  | GGIG / YL        |
| <i>P. putida</i> KT2440                                                     | AAN68051              | AAN66709              | GGIG / YL        |
| <i>P. fluorescens</i> PF-5                                                  | AAY92664              | AAY94087              | GGIG / YL        |
| <i>P. entomophila</i> L48                                                   | CAK15109              | CAK14101              | GGIG / YL        |
| <i>P. brassicacearum</i> subsp. <i>brassicacearum</i> NFM421                | AEA69737              | AEA70803              | GGIG / YL        |
| <b><i>Salmonella</i> sp.</b>                                                |                       |                       |                  |
| <i>S. enterica</i> subsp. <i>enterica</i> serovar Typhimurium str. LT2      | AAL19559              | AAL19356              | GGIG / YL        |
| <i>S. enterica</i> subsp. <i>arizonae</i> serovar 62:z4,z23:-- str. RSK2980 | YP_001571333          | YP_001571524          | GGIG / YL        |
| <i>S. bongori</i> NCTC 12419                                                | CCC29610              | CCC29455              | GGIG / YL        |
| <b><i>Shewanella</i> sp.</b>                                                |                       |                       |                  |
| <i>S. frigidimarina</i> NCIMB 400                                           | ABI70383              | ABI71307              | GGIG / YL        |
| <i>S. pealeana</i> ATCC 700345                                              | ABV86073              | ABV87894              | GGIG / YL        |
| <i>S. denitrificans</i> OS217                                               | ABE56290              | ABE55373              | GGIG / YL        |
| <i>S. amazonensis</i> SB2B                                                  | ABL98825              | ABM00300              | GGIG / YL        |
| <i>S. baltica</i> OS155                                                     | ABN60374              | ABN61247              | GGIG / YL        |

<sup>a</sup>The 2-Cys Prxs homologous to Prx2 in amino acid sequences were singled out from NCBI protein database (NCBI, <http://www.ncbi.nlm.nih.gov>) using the BLAST (Basic Local Alignment Search Tool, <http://blast.ncbi.nlm.nih.gov>) program and predicted as robust or sensitive Prxs based on the presence of the conserved GGLG/YF motifs in their sequences. The variations in the GGLG/YF motifs are indicated.
